# Supplementary material
Source: PubMed Central journal article supplement (PMC4012637)
Supplement: Supp_Table1.pdf [file Supp_Table1.pdf]

## Supplementary Data

SUPPLEMENTARY TABLE S1. CHARACTERISTICS OF PATIENT DATA USED IN THE ANALYSIS FOR TESTING DATASET

|                                      | <i>hESC methylator-negative</i> | <i>hESC methylator-positive</i> | <i>Total</i>    |
|--------------------------------------|---------------------------------|---------------------------------|-----------------|
| No. of patients                      | 18                              | 17                              | 35              |
| TCGA patient phenotype<br>age, years |                                 |                                 |                 |
| Median (LQ, UQ)                      | 66.0(49.0, 74.0)                | 65.0(52.8,72.0)                 | 65.0(52.0,72.0) |
| No. ≤ 40 years old                   | 3                               | 0                               | 3               |
| Survival (weeks)                     |                                 |                                 |                 |
| Median <sup>a</sup> (CI)             | 19.0(12.4,39.4)                 | 24.0(14.0,40.0)                 | 23.0(14.2,36.5) |
| Sex                                  |                                 |                                 |                 |
| Female                               | 9                               | 10                              | 19              |
| Male                                 | 9                               | 7                               | 16              |

CI, confidence interval; LQ, lower quartile; UQ, upper quartile.

<sup>a</sup>Median survival and corresponding confidence intervals were estimated from the Kaplan-Meier curve.
