# Supplementary material
Source: PubMed Central journal article supplement (PMC4012637)
Supplement: Supp_Table2.pdf [file Supp_Table2.pdf]

SUPPLEMENTARY TABLE S2. THE GENES OF THE 36 GENE PANEL BELONGING TO THE TARGETED CATEGORY OF THE STEM CELL-RELATED GENE SETS

| <i>Gene symbol</i> | <i>Targets</i> |               |              |              |              |              |
|--------------------|----------------|---------------|--------------|--------------|--------------|--------------|
| DTNA               | Nanog targets  | Oct4 targets  | Sox2 targets | NOS targets  |              |              |
| EIF4E              | Myc targets1   |               |              |              |              |              |
| ELAVL1             | Eed targets    |               |              |              |              |              |
| GAP43              | Oct4 targets   |               |              |              |              |              |
| KCNMA1             | Suz12 targets  | Eed targets   | H3K27 bound  | PRC2 targets |              |              |
| ADAM22             | Myc targets2   |               |              |              |              |              |
| CADM4              | H3K27 bound    |               |              |              |              |              |
| DCLK1              | ES expl        | Eed targets   | H3K27 bound  |              |              |              |
| DPP6               | Suz12 targets  | H3K27 bound   |              |              |              |              |
| GLT25D2            | Suz12 targets  | Eed targets   | H3K27 bound  | PRC2 targets |              |              |
| GNAO1              | H3K27 bound    |               |              |              |              |              |
| INA                | Suz12 targets  | Eed targets   | H3K27 bound  | PRC2 targets |              |              |
| KCNMB4             | Oct4 targets   | Sox2 targets  |              |              |              |              |
| NEFM               | Oct4 targets   | Suz12 targets | Eed targets  | H3K27 bound  | PRC2 targets | Myc targets1 |
| NTRK2              | Suz12 targets  | Eed targets   | H3K27 bound  | PRC2 targets |              |              |
| NTRK3              | Suz12 targets  |               |              |              |              |              |
| SCG3               | Sox2 targets   |               |              |              |              |              |
| SLC44A1            | Nanog targets  | Oct4 targets  | Sox2 targets | NOS targets  |              |              |
| SLITRK5            | Suz12 targets  |               |              |              |              |              |
| SOX2               | ES expl        | Nanog targets | Oct4 targets | Sox2 targets | NOS targets  | NOS TFs      |
| STMN2              | Oct4 targets   | Suz12 targets | Eed targets  | H3K27 bound  | PRC2 targets |              |
| ZNF365             | Suz12 targets  | Eed targets   |              |              |              |              |
| FGFR2              | Nanog targets  | Oct4 targets  | Sox2 targets | NOS targets  |              |              |
| GRM3               | Eed targets    |               |              |              |              |              |
| KCNA1              | Suz12 targets  | Eed targets   | H3K27 bound  | PRC2 targets |              |              |
| MT3                | H3K27 bound    | Myc targets2  |              |              |              |              |
| FUT9               | H3K27 bound    |               |              |              |              |              |
| GPM6B              | ES expl        | Suz12 targets | Eed targets  | H3K27 bound  | PRC2 targets |              |
| GRIA2              | Suz12 targets  | Eed targets   | H3K27 bound  | PRC2 targets |              |              |
| NEFL               | Oct4 targets   | Suz12 targets | Eed targets  | H3K27 bound  | PRC2 targets |              |
| NKX2-2             | Suz12 targets  | Eed targets   | H3K27 bound  | PRC2 targets |              |              |
| PDE4DIP            | Suz12 targets  | Eed targets   | H3K27 bound  | PRC2 targets |              |              |
| PLLP               | H3K27 bound    |               |              |              |              |              |
| OU3F2              | Eed targets    | H3K27 bound   |              |              |              |              |
| RAB33A             | Suz12 targets  | H3K27 bound   |              |              |              |              |
| TMEM59L            | Suz12 targets  | Eed targets   | H3K27 bound  | PRC2 targets |              |              |
