# Supplementary material
Source: PubMed Central journal article supplement (PMC4012637)
Supplement: Supp_Table3.pdf [file Supp_Table3.pdf]

SUPPLEMENTARY TABLE S3. THE 250 FEATURE  
GENES THAT WERE HIGHLY ENRICHED  
FOR THE TOP 25 SIGNIFICANT GO TERMS

| <i>NO.</i> | <i>GO Term</i>                                        | <i>Fisher Exact</i> |
|------------|-------------------------------------------------------|---------------------|
| 1          | neuron differentiation                                | 8.40E-08            |
| 2          | sensory organ development                             | 2.00E-07            |
| 3          | neuron development                                    | 4.50E-07            |
| 4          | neuron projection morphogenesis                       | 4.50E-07            |
| 5          | axonogenesis                                          | 7.70E-07            |
| 6          | neuron projection development                         | 9.20E-07            |
| 7          | cell morphogenesis involved in neuron differentiation | 2.00E-06            |
| 8          | cell projection morphogenesis                         | 2.60E-06            |
| 9          | response to drug                                      | 2.90E-06            |
| 10         | cell part morphogenesis                               | 4.10E-06            |
| 11         | cell projection organization                          | 4.50E-06            |
| 12         | female pregnancy                                      | 5.80E-06            |
| 13         | pattern specification process                         | 6.30E-06            |
| 14         | regulation of system process                          | 7.50E-06            |
| 15         | cell morphogenesis involved in differentiation        | 1.00E-05            |
| 16         | cell motion                                           | 1.20E-05            |
| 17         | regulation of cell proliferation                      | 1.70E-05            |
| 18         | regulation of apoptosis                               | 2.40E-05            |
| 19         | regulation of programmed cell death                   | 2.50E-05            |
| 20         | regulation of cell death                              | 3.40E-05            |
| 21         | autonomic nervous system development                  | 4.10E-05            |
| 22         | gland development                                     | 4.30E-05            |
| 23         | cell morphogenesis                                    | 5.80E-05            |
| 24         | embryonic morphogenesis                               | 6.70E-05            |
| 25         | regulation of epithelial cell proliferation           | 7.10E-05            |
