# Supplementary material
Source: PubMed Central journal article supplement (PMC4012637)
Supplement: Supp_Table4.pdf [file Supp_Table4.pdf]

SUPPLEMENTARY TABLE S4. THE 36 GENE PANEL  
 WAS HIGHLY ENRICHED FOR THE FOLLOWING  
 TOP 25 SIGNIFICANT GO TERMS

| <i>NO.</i> | <i>Term</i>                                                     | <i>Fisher Exact</i> |
|------------|-----------------------------------------------------------------|---------------------|
| 1          | neuron differentiation                                          | 9.20E-11            |
| 2          | regulation of neurogenesis                                      | 2.70E-09            |
| 3          | regulation of nervous system<br>development                     | 8.50E-09            |
| 4          | regulation of cell development                                  | 1.40E-08            |
| 5          | regulation of neuron differentiation                            | 1.60E-08            |
| 6          | transmission of nerve impulse                                   | 4.90E-07            |
| 7          | regulation of neuron projection<br>development                  | 6.10E-07            |
| 8          | regulation of cell projection<br>organization                   | 8.70E-07            |
| 9          | neurofilament cytoskeleton<br>organization                      | 1.60E-06            |
| 10         | regulation of action potential<br>in neuron                     | 6.60E-06            |
| 11         | regulation of axonogenesis                                      | 8.20E-06            |
| 12         | cell-cell signaling                                             | 1.20E-05            |
| 13         | regulation of action potential                                  | 1.50E-05            |
| 14         | synaptic transmission                                           | 1.50E-05            |
| 15         | regulation of system process                                    | 1.60E-05            |
| 16         | regulation of cell morphogenesis<br>involved in differentiation | 1.70E-05            |
| 17         | neuron development                                              | 2.70E-05            |
| 18         | intermediate filament cytoskeleton<br>organization              | 3.00E-05            |
| 19         | neurological system process                                     | 3.80E-05            |
| 20         | response to inorganic substance                                 | 4.60E-05            |
| 21         | intermediate filament-based process                             | 5.00E-05            |
| 22         | mechanoreceptor differentiation                                 | 6.20E-05            |
| 23         | neuron projection development                                   | 6.80E-05            |
| 24         | neuromuscular process controlling<br>balance                    | 9.40E-05            |
| 25         | regulation of cellular component size                           | 1.00E-04            |
